# Supplementary material for: Fluorinated hydrogel nanoparticles with regulable fluorine contents andT2relaxation times as19F MRI contrast agents
Source: Royal Society of Chemistry journal article supplement (doi:10.1039/d3ra02827e), 2023-01-01
Supplement: d3ra02827e1.pdf [file d3ra02827e1.pdf]

Supporting Information

Fluorinated Hydrogel Nanoparticles with Regulable Fluorine Contents and  $T_2$  Relaxation Times as  $^{19}\text{F}$  MRI Contrast Agents

Ziwei Duan<sup>1</sup>, Changjiang Liu<sup>1</sup>, Junjie Tang<sup>1</sup>, Ruling Zhang<sup>1</sup>, Danfeng Peng<sup>2</sup>, Ruitao Lu<sup>2</sup>, Zong Cao<sup>1\*</sup>, Dalin Wu<sup>1\*</sup>

<sup>1</sup>School of Biomedical Engineering, Shenzhen Campus of Sun Yat-Sen University, Shenzhen, 518107, China.

<sup>2</sup>Shenzhen International Institute for Biomedical Research, Shenzhen, 518109, China.

\*Corresponding Author

E-mail: [wudlin6@mail.sysu.edu.cn](mailto:wudlin6@mail.sysu.edu.cn)

E-mail: [caozhong@mail.sysu.edu.cn](mailto:caozhong@mail.sysu.edu.cn)

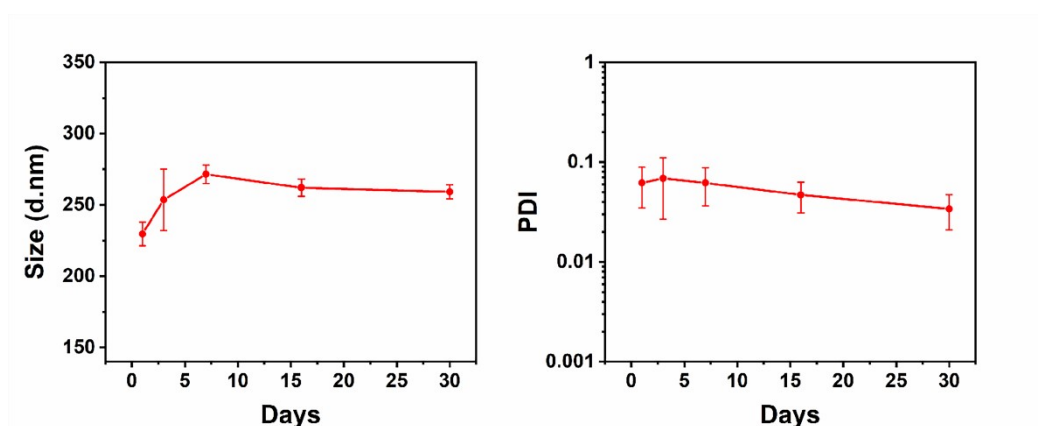

**Figure S1.** The diameter values of  $^{19}\text{F}$  MRI HNCAs-1 in PBS solution at different time measured by DLS.

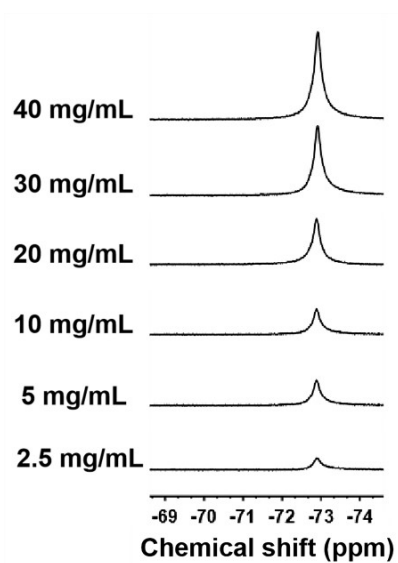

**Figure S2.**  $^{19}\text{F}$  NMR intensity of  $^{19}\text{F}$  MRI HNCAs-1 in aqueous solution ( $\text{D}_2\text{O}/\text{H}_2\text{O}=10/90$ , v/v) at concentration from 2.5 mg/mL to 40 mg/mL.

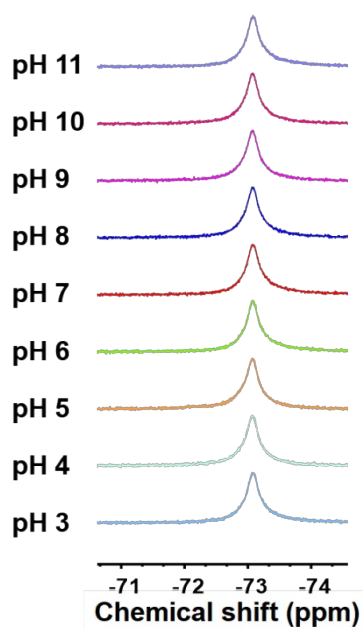

**Figure S3.**  $^{19}\text{F}$  NMR intensity of  $^{19}\text{F}$  MRI HNCAs-1 in aqueous solution ( $\text{D}_2\text{O}/\text{H}_2\text{O}=10/90$ , v/v) at variable pH values (3-11) at the same concentration of nanoobjects (5 mg/mL).

**Table S1.** The constitution and characteristics of  $^{19}\text{F}$  MRI HNCAs

| Name                        | Monomer feed ratio |           | Diameter (nm) | PDI   | Zeta potential (mV) |
|-----------------------------|--------------------|-----------|---------------|-------|---------------------|
|                             | TBA (mL)           | TFMA (mL) |               |       |                     |
| $^{19}\text{F}$ MRI HNCAs-1 | 9                  | 1         | 230.4±73.2    | 0.059 | -22.4±0.4           |
| $^{19}\text{F}$ MRI HNCAs-2 | 8                  | 2         | 226±74.12     | 0.115 | -13.8±0.8           |
| $^{19}\text{F}$ MRI HNCAs-3 | 7                  | 3         | 189.3±69.3    | 0.119 | -19.3±0.1           |
| $^{19}\text{F}$ MRI HNCAs-4 | 6                  | 4         | 211.5±67.7    | 0.083 | -16.9±0.3           |
| $^{19}\text{F}$ MRI HNCAs-5 | 5                  | 5         | 242.7±64.5    | 0.108 | -20.6±1             |

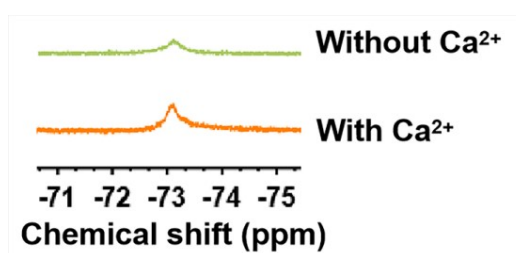

**Figure S4.** The  $^{19}\text{F}$  NMR intensity comparison of  $^{19}\text{F}$  MRI HNCAs-1 in aqueous solution. (upper: without  $\text{Ca}^{2+}$ , below: with 6 mg/mL  $\text{Ca}^{2+}$ ).

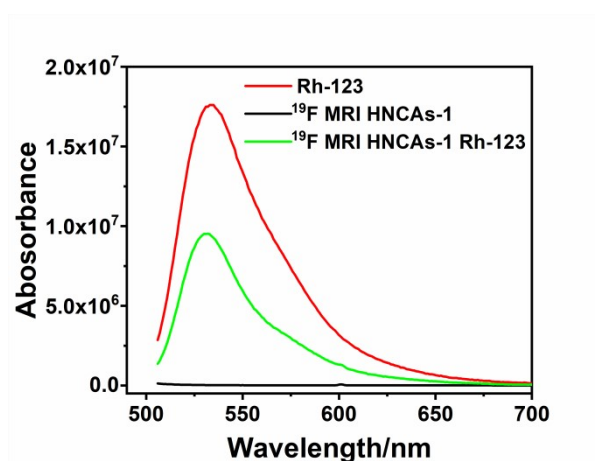

**Figure S5.** Fluorescence spectrum of Rhodamine-123 modified  $^{19}\text{F}$  MRI HNCAs-1 ( $^{19}\text{F}$  MRI HNCAs-1 Rh-123) aqueous solution.

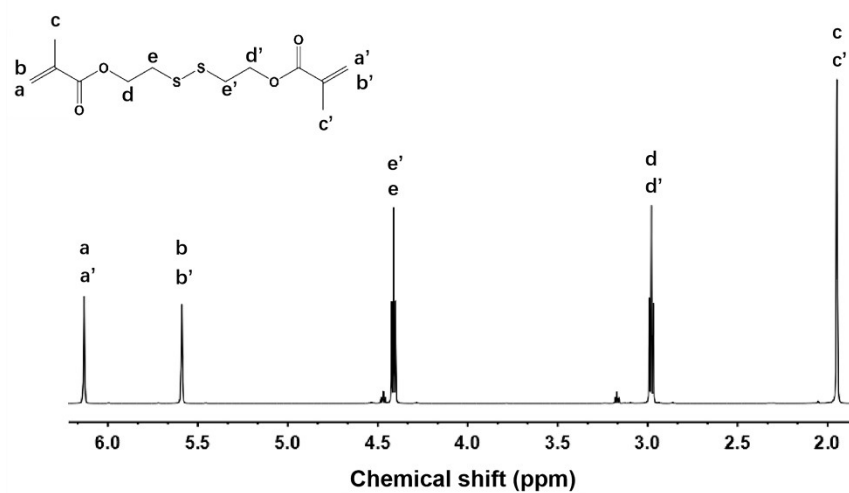

**Figure S6.** <sup>1</sup>H NMR spectrum of disulphide dimethacrylate.
